# Supplementary material for: Penetrance of symbiont-mediated parthenogenesis is driven by reproductive rate in a parasitoid wasp
Source: PeerJ. 2017 Jun 27;5:e3505. doi: 10.7717/peerj.3505 (PMC5490460; doi:10.7717/peerj.3505)
Supplement: Supplemental Information 1 [file peerj-05-3505-s001.xlsx]

## Sheet: Figures 2 and 3
Card	Treatment	Replicate	Day	Female	Male	Intersex
HA1-1-1	HA1	1	1	28	0	0
HA1-2-1	HA1	2	1	28	0	0
HA1-3-1	HA1	3	1	37	0	0
HA1-4-1	HA1	4	1	35	0	0
HA1-5-1	HA1	5	1	27	0	0
HA1-6-1	HA1	6	1	23	0	0
HA1-7-1	HA1	7	1	28	0	0
HA1-8-1	HA1	8	1	19	3	1
HA1-9-1	HA1	9	1	39	0	0
HA1-10-1	HA1	10	1	28	0	0
HA1-11-1	HA1	11	1	44	0	0
HA1-12-1	HA1	12	1	25	0	0
HA1-13-1	HA1	13	1	11	15	4
HA1-14-1	HA1	14	1	36	0	0
HA1-15-1	HA1	15	1	25	0	0
HA1-16-1	HA1	16	1	32	2	0
HA1-17-1	HA1	17	1	35	0	0
HA1-18-1	HA1	18	1	43	0	0
HA1-19-1	HA1	19	1	32	0	0
HA1-20-1	HA1	20	1	29	0	0
HA3-1-1	HA3	1	1	4	2	0
HA3-2-1	HA3	2	1	7	0	0
HA3-3-1	HA3	3	1	9	0	0
HA3-4-1	HA3	4	1	8	0	0
HA3-5-1	HA3	5	1	13	0	0
HA3-6-1	HA3	6	1	13	0	0
HA3-7-1	HA3	7	1	10	0	0
HA3-8-1	HA3	8	1	20	0	0
HA3-9-1	HA3	9	1	15	0	0
HA3-10-1	HA3	10	1	27	0	0
HA3-12-1	HA3	12	1	14	0	0
HA3-13-1	HA3	13	1	9	0	0
HA3-14-1	HA3	14	1	15	0	0
HA3-15-1	HA3	15	1	12	2	1
HA3-16-1	HA3	16	1	17	0	0
HA3-17-1	HA3	17	1	15	0	0
HA3-18-1	HA3	18	1	18	0	0
HA3-19-1	HA3	19	1	17	0	0
HA3-20-1	HA3	20	1	18	0	0
HA2-1-1	HA2	1	1	25	0	0
HA2-2-1	HA2	2	1	35	0	0
HA2-4-1	HA2	4	1	31	0	0
HA2-5-1	HA2	5	1	28	0	0
HA2-6-1	HA2	6	1	34	0	0
HA2-7-1	HA2	7	1	34	1	0
HA2-8-1	HA2	8	1	35	0	0
HA2-9-1	HA2	9	1	23	0	0
HA2-10-1	HA2	10	1	26	0	0
HA2-11-1	HA2	11	1	31	0	0
HA2-12-1	HA2	12	1	30	0	0
HA2-13-1	HA2	13	1	37	0	0
HA2-14-1	HA2	14	1	34	0	0
HA2-15-1	HA2	15	1	37	0	0
HA2-16-1	HA2	16	1	33	0	0
HA2-17-1	HA2	17	1	38	2	1
HA2-18-1	HA2	18	1	35	0	0
HA2-19-1	HA2	19	1	42	0	0
HA2-20-1	HA2	20	1	19	0	1
HA1-1-2	HA1	1	2	9	0	0
HA1-2-2	HA1	2	2	16	0	0
HA1-3-2	HA1	3	2	18	0	0
HA1-4-2	HA1	4	2	16	0	0
HA1-5-2	HA1	5	2	14	0	0
HA1-6-2	HA1	6	2	13	0	0
HA1-7-2	HA1	7	2	16	0	0
HA1-8-2	HA1	8	2	11	0	0
HA1-9-2	HA1	9	2	19	0	0
HA1-10-2	HA1	10	2	16	0	0
HA1-11-2	HA1	11	2	16	0	0
HA1-12-2	HA1	12	2	14	0	0
HA1-13-2	HA1	13	2	12	0	0
HA1-14-2	HA1	14	2	17	0	0
HA1-15-2	HA1	15	2	13	0	0
HA1-16-2	HA1	16	2	14	0	0
HA1-17-2	HA1	17	2	9	0	0
HA1-18-2	HA1	18	2	15	0	0
HA1-19-2	HA1	19	2	14	0	0
HA1-20-2	HA1	20	2	11	0	0
HA3-2-2	HA3	2	2	11	0	0
HA3-3-2	HA3	3	2	19	0	0
HA3-4-2	HA3	4	2	6	0	0
HA3-5-2	HA3	5	2	3	0	0
HA3-6-2	HA3	6	2	11	0	0
HA3-7-2	HA3	7	2	14	0	0
HA3-8-2	HA3	8	2	18	0	0
HA3-9-2	HA3	9	2	14	0	0
HA3-10-2	HA3	10	2	13	0	0
HA3-11-2	HA3	11	2	3	0	0
HA3-12-2	HA3	12	2	17	0	0
HA3-13-2	HA3	13	2	21	0	0
HA3-14-2	HA3	14	2	19	0	0
HA3-15-2	HA3	15	2	12	0	0
HA3-16-2	HA3	16	2	15	0	0
HA3-17-2	HA3	17	2	16	0	0
HA3-18-2	HA3	18	2	9	0	0
HA3-19-2	HA3	19	2	15	0	0
HA3-20-2	HA3	20	2	15	0	0
HA1-1-3	HA1	1	3	3	1	0
HA1-2-3	HA1	2	3	4	0	0
HA1-3-3	HA1	3	3	11	1	0
HA1-4-3	HA1	4	3	8	1	1
HA1-5-3	HA1	5	3	8	0	0
HA1-6-3	HA1	6	3	5	2	1
HA1-7-3	HA1	7	3	8	0	1
HA1-8-3	HA1	8	3	7	0	2
HA1-9-3	HA1	9	3	14	0	0
HA1-10-3	HA1	10	3	6	0	0
HA1-11-3	HA1	11	3	13	0	2
HA1-12-3	HA1	12	3	5	0	4
HA1-13-3	HA1	13	3	3	1	0
HA1-14-3	HA1	14	3	8	0	1
HA1-15-3	HA1	15	3	4	0	2
HA1-16-3	HA1	16	3	11	0	1
HA1-17-3	HA1	17	3	3	0	0
HA1-18-3	HA1	18	3	7	2	0
HA1-19-3	HA1	19	3	14	0	0
HA1-20-3	HA1	20	3	2	0	0
HA3-2-3	HA3	2	3	14	0	0
HA3-3-3	HA3	3	3	13	0	0
HA3-4-3	HA3	4	3	6	0	0
HA3-5-3	HA3	5	3	8	0	0
HA3-6-3	HA3	6	3	12	0	0
HA3-7-3	HA3	7	3	8	0	0
HA3-8-3	HA3	8	3	12	0	0
HA3-9-3	HA3	9	3	7	0	0
HA3-10-3	HA3	10	3	6	0	0
HA3-11-3	HA3	11	3	15	0	0
HA3-12-3	HA3	12	3	15	0	0
HA3-13-3	HA3	13	3	11	0	0
HA3-14-3	HA3	14	3	7	0	0
HA3-15-3	HA3	15	3	7	0	0
HA3-16-3	HA3	16	3	10	0	0
HA3-17-3	HA3	17	3	18	0	0
HA3-18-3	HA3	18	3	7	0	0
HA3-19-3	HA3	19	3	7	0	0
HA3-20-3	HA3	20	3	6	0	0
HA2-1-3	HA2	1	3	18	0	0
HA2-2-3	HA2	2	3	20	1	0
HA2-4-3	HA2	4	3	27	0	0
HA2-5-3	HA2	5	3	16	0	0
HA2-6-3	HA2	6	3	18	1	0
HA2-8-3	HA2	8	3	19	0	0
HA2-9-3	HA2	9	3	16	1	0
HA2-10-3	HA2	10	3	23	0	0
HA2-11-3	HA2	11	3	17	0	2
HA2-12-3	HA2	12	3	19	0	0
HA2-13-3	HA2	13	3	25	0	0
HA2-14-3	HA2	14	3	21	1	0
HA2-15-3	HA2	15	3	29	0	0
HA2-16-3	HA2	16	3	17	0	0
HA2-17-3	HA2	17	3	26	0	1
HA2-18-3	HA2	18	3	20	1	1
HA2-19-3	HA2	19	3	25	0	0
HA2-20-3	HA2	20	3	14	1	1
HA1-1-4	HA1	1	4	1	1	0
HA1-2-4	HA1	2	4	1	0	2
HA1-3-4	HA1	3	4	2	0	1
HA1-4-4	HA1	4	4	8	0	0
HA1-5-4	HA1	5	4	9	1	0
HA1-6-4	HA1	6	4	0	0	0
HA1-7-4	HA1	7	4	0	0	0
HA1-8-4	HA1	8	4	2	2	0
HA1-9-4	HA1	9	4	3	1	0
HA1-10-4	HA1	10	4	5	2	0
HA1-11-4	HA1	11	4	8	1	2
HA1-12-4	HA1	12	4	5	0	1
HA1-13-4	HA1	13	4	3	0	0
HA1-14-4	HA1	14	4	5	1	0
HA1-15-4	HA1	15	4	2	1	0
HA1-16-4	HA1	16	4	2	2	0
HA1-18-4	HA1	18	4	4	1	0
HA1-19-4	HA1	19	4	2	0	0
HA1-20-4	HA1	20	4	4	1	0
HA3-2-4	HA3	2	4	11	0	0
HA3-3-4	HA3	3	4	9	0	0
HA3-4-4	HA3	4	4	4	0	0
HA3-5-4	HA3	5	4	5	0	0
HA3-6-4	HA3	6	4	14	0	0
HA3-7-4	HA3	7	4	8	0	0
HA3-8-4	HA3	8	4	13	0	0
HA3-9-4	HA3	9	4	11	0	0
HA3-10-4	HA3	10	4	6	0	0
HA3-11-4	HA3	11	4	14	0	0
HA3-12-4	HA3	12	4	9	0	0
HA3-13-4	HA3	13	4	6	0	0
HA3-14-4	HA3	14	4	6	0	0
HA3-15-4	HA3	15	4	6	0	0
HA3-16-4	HA3	16	4	7	0	0
HA3-17-4	HA3	17	4	12	0	0
HA3-18-4	HA3	18	4	9	0	0
HA3-19-4	HA3	19	4	7	0	0
HA3-20-4	HA3	20	4	9	0	0
HA1-1-5	HA1	1	5	0	1	0
HA1-2-5	HA1	2	5	2	0	0
HA1-3-5	HA1	3	5	1	3	2
HA1-4-5	HA1	4	5	1	3	0
HA1-5-5	HA1	5	5	4	1	0
HA1-6-5	HA1	6	5	0	3	0
HA1-7-5	HA1	7	5	3	0	0
HA1-8-5	HA1	8	5	0	3	0
HA1-9-5	HA1	9	5	5	2	0
HA1-10-5	HA1	10	5	2	4	0
HA1-11-5	HA1	11	5	1	1	0
HA1-12-5	HA1	12	5	0	2	2
HA1-13-5	HA1	13	5	1	0	0
HA1-14-5	HA1	14	5	2	2	1
HA1-15-5	HA1	15	5	3	1	0
HA1-16-5	HA1	16	5	1	1	0
HA1-17-5	HA1	17	5	0	0	0
HA1-18-5	HA1	18	5	3	4	0
HA1-19-5	HA1	19	5	4	1	1
HA1-20-5	HA1	20	5	4	0	0
HA3-2-5	HA3	2	5	6	0	0
HA3-3-5	HA3	3	5	9	0	0
HA3-4-5	HA3	4	5	8	0	0
HA3-5-5	HA3	5	5	3	0	0
HA3-6-5	HA3	6	5	10	0	0
HA3-7-5	HA3	7	5	10	0	0
HA3-8-5	HA3	8	5	11	0	0
HA3-9-5	HA3	9	5	8	0	0
HA3-10-5	HA3	10	5	8	0	0
HA3-11-5	HA3	11	5	16	0	0
HA3-12-5	HA3	12	5	9	0	0
HA3-13-5	HA3	13	5	9	0	0
HA3-14-5	HA3	14	5	10	0	0
HA3-15-5	HA3	15	5	5	0	0
HA3-16-5	HA3	16	5	5	0	0
HA3-17-5	HA3	17	5	9	0	0
HA3-18-5	HA3	18	5	11	0	0
HA3-19-5	HA3	19	5	8	0	0
HA3-20-5	HA3	20	5	6	0	0
HA2-1-5	HA2	1	5	10	0	1
HA2-2-5	HA2	2	5	13	4	0
HA2-4-5	HA2	4	5	14	4	1
HA2-5-5	HA2	5	5	13	0	1
HA2-6-5	HA2	6	5	11	0	0
HA2-8-5	HA2	8	5	19	0	0
HA2-9-5	HA2	9	5	15	2	2
HA2-10-5	HA2	10	5	7	3	0
HA2-11-5	HA2	11	5	13	2	2
HA2-12-5	HA2	12	5	10	0	0
HA2-13-5	HA2	13	5	15	2	3
HA2-14-5	HA2	14	5	14	0	1
HA2-15-5	HA2	15	5	20	0	1
HA2-16-5	HA2	16	5	7	0	2
HA2-17-5	HA2	17	5	9	6	2
HA2-18-5	HA2	18	5	6	2	1
HA2-19-5	HA2	19	5	16	0	0
HA2-20-5	HA2	20	5	14	2	0
HA1-1-6	HA1	1	6	0	2	0
HA1-2-6	HA1	2	6	1	2	0
HA1-3-6	HA1	3	6	3	1	0
HA1-4-6	HA1	4	6	1	1	0
HA1-5-6	HA1	5	6	2	3	2
HA1-6-6	HA1	6	6	0	2	1
HA1-7-6	HA1	7	6	2	0	1
HA1-8-6	HA1	8	6	0	4	0
HA1-9-6	HA1	9	6	6	2	0
HA1-10-6	HA1	10	6	1	1	0
HA1-11-6	HA1	11	6	1	2	1
HA1-12-6	HA1	12	6	2	2	0
HA1-13-6	HA1	13	6	1	3	0
HA1-14-6	HA1	14	6	5	1	0
HA1-15-6	HA1	15	6	1	0	0
HA1-16-6	HA1	16	6	1	4	0
HA1-18-6	HA1	18	6	3	3	0
HA1-19-6	HA1	19	6	0	4	0
HA1-20-6	HA1	20	6	2	0	1
HA3-2-6	HA3	2	6	10	0	0
HA3-3-6	HA3	3	6	5	0	0
HA3-4-6	HA3	4	6	8	1	0
HA3-5-6	HA3	5	6	2	0	0
HA3-6-6	HA3	6	6	9	0	0
HA3-7-6	HA3	7	6	5	0	0
HA3-8-6	HA3	8	6	7	0	0
HA3-9-6	HA3	9	6	6	0	0
HA3-10-6	HA3	10	6	8	0	0
HA3-11-6	HA3	11	6	9	0	1
HA3-12-6	HA3	12	6	10	0	0
HA3-13-6	HA3	13	6	7	0	0
HA3-14-6	HA3	14	6	9	0	0
HA3-15-6	HA3	15	6	8	0	0
HA3-16-6	HA3	16	6	2	0	0
HA3-17-6	HA3	17	6	9	0	0
HA3-18-6	HA3	18	6	6	0	0
HA3-19-6	HA3	19	6	5	0	0
HA3-20-6	HA3	20	6	6	0	0
HA1-1-7	HA1	1	7	4	1	0
HA1-2-7	HA1	2	7	3	1	0
HA1-3-7	HA1	3	7	2	2	1
HA1-4-7	HA1	4	7	0	0	0
HA1-5-7	HA1	5	7	1	0	2
HA1-6-7	HA1	6	7	0	4	0
HA1-7-7	HA1	7	7	4	2	0
HA1-8-7	HA1	8	7	0	1	0
HA1-9-7	HA1	9	7	5	2	0
HA1-10-7	HA1	10	7	3	1	0
HA1-11-7	HA1	11	7	0	0	0
HA1-12-7	HA1	12	7	3	1	1
HA1-13-7	HA1	13	7	0	3	0
HA1-14-7	HA1	14	7	4	0	1
HA1-15-7	HA1	15	7	2	4	0
HA1-16-7	HA1	16	7	1	4	0
HA1-18-7	HA1	18	7	1	2	0
HA1-19-7	HA1	19	7	1	1	0
HA1-20-7	HA1	20	7	0	2	0
HA3-2-7	HA3	2	7	3	0	0
HA3-3-7	HA3	3	7	6	0	0
HA3-6-7	HA3	6	7	6	0	1
HA3-7-7	HA3	7	7	6	0	0
HA3-8-7	HA3	8	7	8	0	0
HA3-10-7	HA3	10	7	7	0	0
HA3-11-7	HA3	11	7	8	1	0
HA3-12-7	HA3	12	7	5	0	0
HA3-13-7	HA3	13	7	3	0	0
HA3-14-7	HA3	14	7	5	0	1
HA3-15-7	HA3	15	7	6	0	0
HA3-16-7	HA3	16	7	4	0	0
HA3-17-7	HA3	17	7	6	0	0
HA3-18-7	HA3	18	7	4	0	0
HA3-19-7	HA3	19	7	1	0	1
HA2-1-7	HA2	1	7	4	2	1
HA2-2-7	HA2	2	7	5	5	0
HA2-4-7	HA2	4	7	15	3	2
HA2-5-7	HA2	5	7	14	1	0
HA2-6-7	HA2	6	7	3	3	0
HA2-8-7	HA2	8	7	10	2	0
HA2-9-7	HA2	9	7	9	1	1
HA2-10-7	HA2	10	7	1	8	0
HA2-11-7	HA2	11	7	6	2	0
HA2-12-7	HA2	12	7	6	0	0
HA2-13-7	HA2	13	7	13	4	0
HA2-14-7	HA2	14	7	13	0	0
HA2-15-7	HA2	15	7	6	2	1
HA2-16-7	HA2	16	7	0	1	0
HA2-17-7	HA2	17	7	8	4	0
HA2-19-7	HA2	19	7	9	1	1
HA2-20-7	HA2	20	7	7	0	1

## Sheet: Figure 4
Card	Treatment	Replicate	Day	Female	Male	Intersex
CON-1-1	CON	1	1	25	0	0
CON-2-1	CON	2	1	22	0	0
CON-3-1	CON	3	1	33	0	0
CON-4-1	CON	4	1	30	0	0
CON-5-1	CON	5	1	26	0	0
CON-6-1	CON	6	1	24	2	0
CON-7-1	CON	7	1	23	0	0
CON-8-1	CON	8	1	19	7	0
CON-9-1	CON	9	1	23	3	1
CON-10-1	CON	10	1	31	0	0
CON-11-1	CON	11	1	17	0	0
CON-12-1	CON	12	1	24	0	0
EX-1-1	EX	1	1	10	0	0
EX-2-1	EX	2	1	10	0	0
EX-3-1	EX	3	1	10	0	0
EX-4-1	EX	4	1	7	1	0
EX-5-1	EX	5	1	10	0	0
EX-6-1	EX	6	1	11	0	0
EX-7-1	EX	7	1	7	0	0
EX-8-1	EX	8	1	10	0	0
EX-9-1	EX	9	1	16	0	0
EX-10-1	EX	10	1	10	0	0
EX-11-1	EX	11	1	10	1	0
EX-12-1	EX	12	1	9	0	0
CON-1-2	CON	1	2	15	0	0
CON-2-2	CON	2	2	1	0	0
CON-3-2	CON	3	2	11	0	0
CON-4-2	CON	4	2	16	0	0
CON-5-2	CON	5	2	9	0	0
CON-6-2	CON	6	2	13	0	0
CON-7-2	CON	7	2	10	0	0
CON-8-2	CON	8	2	12	0	2
CON-9-2	CON	9	2	11	0	1
CON-10-2	CON	10	2	13	0	0
CON-11-2	CON	11	2	7	0	0
CON-12-2	CON	12	2	14	0	0
EX-1-2	EX	1	2	10	0	0
EX-2-2	EX	2	2	25	0	0
EX-3-2	EX	3	2	19	0	0
EX-4-2	EX	4	2	22	0	0
EX-5-2	EX	5	2	24	0	0
EX-6-2	EX	6	2	24	0	0
EX-7-2	EX	7	2	23	0	0
EX-8-2	EX	8	2	27	0	0
EX-9-2	EX	9	2	24	0	0
EX-10-2	EX	10	2	27	0	0
EX-11-2	EX	11	2	24	0	0
EX-12-2	EX	12	2	30	0	0
CON-1-3	CON	1	3	8	1	2
CON-2-3	CON	2	3	7	0	0
CON-3-3	CON	3	3	6	1	0
CON-4-3	CON	4	3	14	0	0
CON-5-3	CON	5	3	1	2	0
CON-6-3	CON	6	3	5	1	1
CON-7-3	CON	7	3	9	0	1
CON-8-3	CON	8	3	7	2	0
CON-9-3	CON	9	3	3	0	0
CON-10-3	CON	10	3	15	0	0
CON-11-3	CON	11	3	8	0	0
CON-12-3	CON	12	3	13	0	0
EX-1-3	EX	1	3	8	1	0
EX-2-3	EX	2	3	9	0	0
EX-3-3	EX	3	3	6	0	0
EX-4-3	EX	4	3	9	0	0
EX-5-3	EX	5	3	15	0	0
EX-7-3	EX	7	3	11	0	1
EX-8-3	EX	8	3	10	0	1
EX-10-3	EX	10	3	9	0	0
EX-11-3	EX	11	3	8	0	0
EX-12-3	EX	12	3	7	0	0
CON-1-4	CON	1	4	4	4	0
CON-2-4	CON	2	4	2	0	0
CON-3-4	CON	3	4	4	0	0
CON-4-4	CON	4	4	3	2	0
CON-5-4	CON	5	4	4	2	1
CON-6-4	CON	6	4	8	2	0
CON-7-4	CON	7	4	3	1	0
CON-8-4	CON	8	4	1	0	0
CON-9-4	CON	9	4	0	1	0
CON-10-4	CON	10	4	7	2	0
CON-11-4	CON	11	4	6	0	0
CON-12-4	CON	12	4	5	1	0
EX-1-4	EX	1	4	3	0	0
EX-2-4	EX	2	4	9	0	0
EX-3-4	EX	3	4	4	0	0
EX-4-4	EX	4	4	4	0	0
EX-5-4	EX	5	4	6	0	0
EX-6-4	EX	6	4	1	2	0
EX-7-4	EX	7	4	11	2	0
EX-8-4	EX	8	4	5	0	0
EX-9-4	EX	9	4	0	0	0
EX-10-4	EX	10	4	5	0	0
EX-11-4	EX	11	4	5	0	0
EX-12-4	EX	12	4	3	0	0
CON-1-5	CON	1	5	2	2	0
CON-2-5	CON	2	5	5	1	1
CON-3-5	CON	3	5	3	2	0
CON-4-5	CON	4	5	0	0	0
CON-5-5	CON	5	5	5	2	0
CON-6-5	CON	6	5	1	0	2
CON-7-5	CON	7	5	1	1	1
CON-8-5	CON	8	5	0	6	0
CON-9-5	CON	9	5	1	2	0
CON-10-5	CON	10	5	1	3	1
CON-11-5	CON	11	5	1	1	0
CON-12-5	CON	12	5	1	1	2
EX-1-5	EX	1	5	9	0	0
EX-2-5	EX	2	5	4	1	1
EX-3-5	EX	3	5	4	1	2
EX-4-5	EX	4	5	4	0	0
EX-5-5	EX	5	5	7	0	0
EX-6-5	EX	6	5	1	1	0
EX-7-5	EX	7	5	5	1	4
EX-8-5	EX	8	5	0	1	1
EX-9-5	EX	9	5	2	0	0
EX-10-5	EX	10	5	2	0	1
EX-11-5	EX	11	5	3	0	2
EX-12-5	EX	12	5	5	0	0
CON-1-6	CON	1	6	2	2	0
CON-2-6	CON	2	6	5	0	0
CON-3-6	CON	3	6	1	1	1
CON-5-6	CON	5	6	1	1	1
CON-6-6	CON	6	6	7	0	2
CON-7-6	CON	7	6	4	0	0
CON-8-6	CON	8	6	1	8	0
CON-9-6	CON	9	6	0	5	0
CON-10-6	CON	10	6	2	1	0
CON-11-6	CON	11	6	1	0	0
CON-12-6	CON	12	6	1	2	0
EX-1-6	EX	1	6	4	0	1
EX-2-6	EX	2	6	8	0	0
EX-3-6	EX	3	6	1	0	1
EX-4-6	EX	4	6	4	1	0
EX-5-6	EX	5	6	2	2	0
EX-6-6	EX	6	6	8	0	0
EX-7-6	EX	7	6	5	2	0
EX-8-6	EX	8	6	1	3	1
EX-9-6	EX	9	6	2	0	0
EX-10-6	EX	10	6	2	0	0
EX-11-6	EX	11	6	0	1	0
EX-12-6	EX	12	6	2	0	0
CON-1-7	CON	1	7	4	5	0
CON-2-7	CON	2	7	6	1	0
CON-3-7	CON	3	7	1	3	0
CON-5-7	CON	5	7	1	2	3
CON-6-7	CON	6	7	7	2	0
CON-7-7	CON	7	7	2	3	0
CON-8-7	CON	8	7	0	6	0
CON-9-7	CON	9	7	0	3	0
CON-10-7	CON	10	7	0	0	0
CON-11-7	CON	11	7	0	0	0
CON-12-7	CON	12	7	1	1	1
EX-1-7	EX	1	7	3	1	0
EX-2-7	EX	2	7	0	3	1
EX-3-7	EX	3	7	0	0	0
EX-4-7	EX	4	7	4	0	0
EX-5-7	EX	5	7	3	4	0
EX-6-7	EX	6	7	0	4	0
EX-7-7	EX	7	7	5	1	1
EX-8-7	EX	8	7	0	0	0
EX-9-7	EX	9	7	2	0	0
EX-10-7	EX	10	7	1	1	0
EX-11-7	EX	11	7	3	2	0
EX-12-7	EX	12	7	3	1	1

## Sheet: Figure 5A
Wasp	Treatment	16S_Ct	wg_Ct	ddCt
HA1-1	HA1	29.14	25.44	1.1239
HA1-2	HA1	28.99	25.32	1.14752
HA1-3	HA1	29.49	25.56	0.95828
HA1-4	HA1	30.14	26.14	0.912894
HA1-5	HA1	29.41	25.55	1.00592
HA1-6	HA1	30.35	26.17	0.805814
HA1-7	HA1	29.65	25.95	1.1239
HA1-8	HA1	29.95	25.57	0.701502
HA1-9	HA1	28.94	25.64	1.483
HA1-10	HA1	29.38	25.41	0.932076
HA1-11	HA1	29.28	25.38	0.978415
HA1-12	HA1	29.44	25.43	0.906588
HA1-13	HA1	29.46	25.5	0.938559
HA1-14	HA1	29.82	25.45	0.706381
HA1-15	HA1	29.18	25.47	1.11614
HA1-16	HA1	30.07	26.53	1.25572
HA1-18	HA1	29.64	25.54	0.85176
HA1-19	HA1	29.73	25.5	0.778365
HA1-20	HA1	24.86	21.34	1.27325
HA3-2	HA3	24.83	21.64	1.6005
HA3-3	HA3	26.4	22.18	0.783779
HA3-5	HA3	27.17	22.29	0.496037
HA3-6	HA3	26.46	22.22	0.772988
HA3-7	HA3	25.97	22.21	1.07812
HA3-8	HA3	24.79	21.03	1.07812
HA3-10	HA3	25.56	21.93	1.17978
HA3-11	HA3	26.65	22.13	0.636626
HA3-12	HA3	24.95	21.55	1.38369
HA3-13	HA3	26.27	22.53	1.09317
HA3-14	HA3	26.54	22.34	0.79472
HA3-15	HA3	24.73	21.5	1.55673
HA3-16	HA3	25.17	21.79	1.403
HA3-17	HA3	24.69	21.42	1.51416
HA3-18	HA3	24.88	21.68	1.58944
HA3-19	HA3	24.03	21.45	2.44277
HA3-20	HA3	25.1	21.9	1.58944
HA2-1	HA2	27.3	22.63	0.57376
HA2-2	HA2	25.57	21.56	0.906588
HA2-4	HA2	25.12	21.48	1.17163
HA2-5	HA2	23.95	20.15	1.04864
HA2-6	HA2	24.23	20.19	0.887931
HA2-8	HA2	24.61	20.39	0.783779
HA2-9	HA2	24.33	20.02	0.736378
HA2-10	HA2	24.58	20.27	0.736378
HA2-11	HA2	24.69	20.92	1.07067
HA2-12	HA2	24.82	21.52	1.483
HA2-13	HA2	26.47	22.21	0.762347
HA2-14	HA2	24.19	20.48	1.11614
HA2-15	HA2	24.25	20.02	0.778365
HA2-16	HA2	24.26	20.35	0.971657
HA2-17	HA2	24.54	19.95	0.606474
HA2-18	HA2	26.45	21.87	0.610693
HA2-19	HA2	25.75	21.44	0.736378
HA2-20	HA2	25.72	21.77	0.945087
HA4-1	HA4	24.59	21	1.21295
HA4-2	HA4	26	22.5	1.29103
HA4-3	HA4	27.33	22.4	0.47914
HA4-4	HA4	25.29	21.95	1.44245
HA4-5	HA4	24.11	21.3	2.08279
HA4-6	HA4	24.55	21.26	1.49332
HA4-7	HA4	25.68	21.7	0.925637
HA4-8	HA4	26.02	22.35	1.14752
HA4-9	HA4	25.51	21.5	0.906588
HA4-10	HA4	23.85	20.02	1.02706
HA4-11	HA4	24.68	20.92	1.07812
HA4-12	HA4	26.37	22.66	1.11614
HA4-13	HA4	27.35	22.23	0.420017
HA4-14	HA4	23.13	19.93	1.58944
HA4-15	HA4	23.22	19.86	1.42259
HA4-16	HA4	23.54	19.83	1.11614
HA4-17	HA4	23.73	20.85	1.98415
HA4-18	HA4	23.69	20.57	1.68007
HA4-19	HA4	23.45	20.61	2.03993
HA4-20	HA4	23.15	20.61	2.51145

## Sheet: Figure 5B
Wasp	Mother	Sex	16S_Ct	wg_Ct	ddCt
fem-1-A	A	female	24.81	20.48	0.458616
fem-2-A	A	female	25.63	21.18	0.422013
fem-3-A	A	female	24.97	21.21	0.680827
fem-1-B	B	female	24.51	21.25	0.962834
fem-2-B	B	female	25.65	22.66	1.16099
fem-3-B	B	female	25.72	22.58	1.04635
fem-1-C	C	female	25.99	23.15	1.2882
fem-2-C	C	female	25.15	22.51	1.47976
fem-3-C	C	female	25.73	23.11	1.50041
male-1-A	A	male	29.56	22.83	0.0868915
male-2-A	A	male	30.57	23.29	0.0593487
male-3-A	A	male	27.33	22.1	0.245766
male-1-B	B	male	27.86	21.33	0.0998122
male-2-B	B	male	30.72	20.54	0.00795104
male-3-B	B	male	27.46	24.18	0.949579
male-1-C	C	male	26.62	23.62	1.15297
male-2-C	C	male	27.13	23.45	0.719646
male-3-C	C	male	27.57	23.47	0.537881
